# Supplementary material for: Controllable fabrication of α-Ni(OH)2 thin films with preheating treatment for long-term stable electrochromic and energy storage applications
Source: Royal Society of Chemistry journal article supplement (doi:10.1039/c9tc06354d), 2020-01-01
Supplement: c9tc06354d2.pdf [file c9tc06354d2.pdf]

## Supporting Information

# Controllable Fabrication of $\alpha$ -Ni(OH)<sub>2</sub> Thin Films with Preheating Treatment for Long-term stable Electrochromic and Energy Storage Applications

*Chunhua Su<sup>†</sup>, Meijia Qiu<sup>‡</sup>, Yipeng An<sup>Ψ</sup>, Siyuan Sun<sup>†</sup>, Chuanxi Zhao<sup>†\*</sup> and Wenjie Mai<sup>†\*</sup>*

<sup>†</sup> Siyuan Laboratory, Guangdong Provincial Engineering Technology Research Center of Vacuum Coating Technologies and New Energy Materials, Department of Physics, Jinan University, Guangzhou, Guangdong 510632, People's Republic of China.

<sup>‡</sup> MOE Laboratory of Bioinorganic and Synthetic Chemistry, The Key Lab of Low-Carbon Chemistry and Energy Conservation of Guangdong Province, School of Chemistry, Sun Yat-sen University, Guangzhou, 510275, China

<sup>Ψ</sup> School of Physics & International United Henan Key Laboratory of Boron Chemistry and Advanced Energy Materials, Henan Normal University, Xinxiang, Henan 453007, China

*E-mail:* [tcxzhao@email.jnu.edu.cn](mailto:tcxzhao@email.jnu.edu.cn); [wenjiemai@email.jnu.edu.cn](mailto:wenjiemai@email.jnu.edu.cn)

(a)

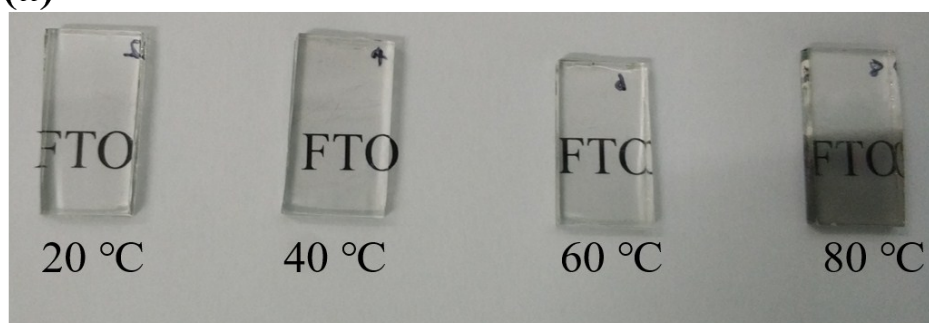

(b)

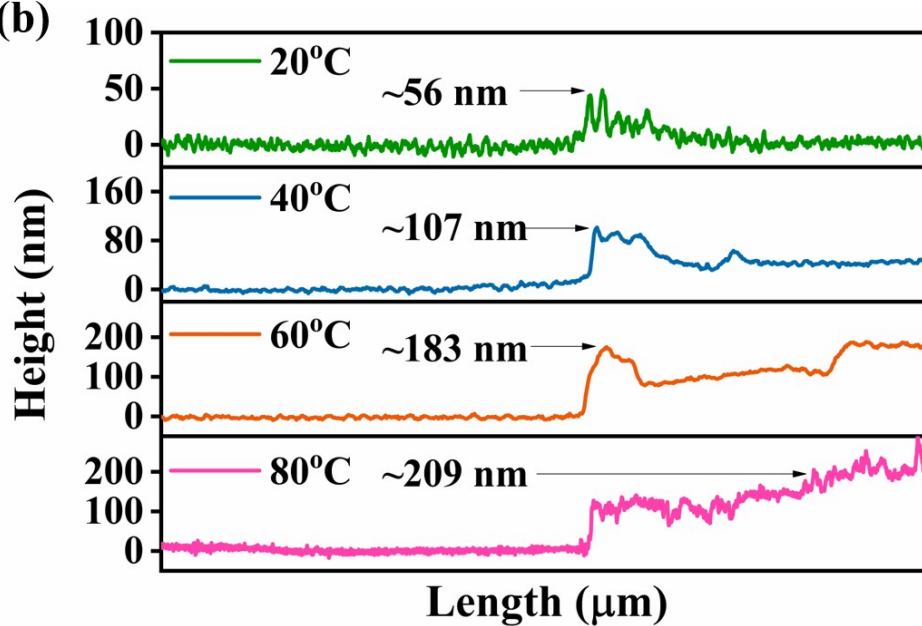

**Figure S1.** (a) The digital photos and (b) loading mass of  $\text{Ni}(\text{OH})_2$  deposited at 20 °C, 40 °C, 60 °C and 80 °C. (b) The thickness characterization of  $\text{Ni}(\text{OH})_2$  electrodes deposited under 20 °C, 40 °C, 60 °C and 80 °C.

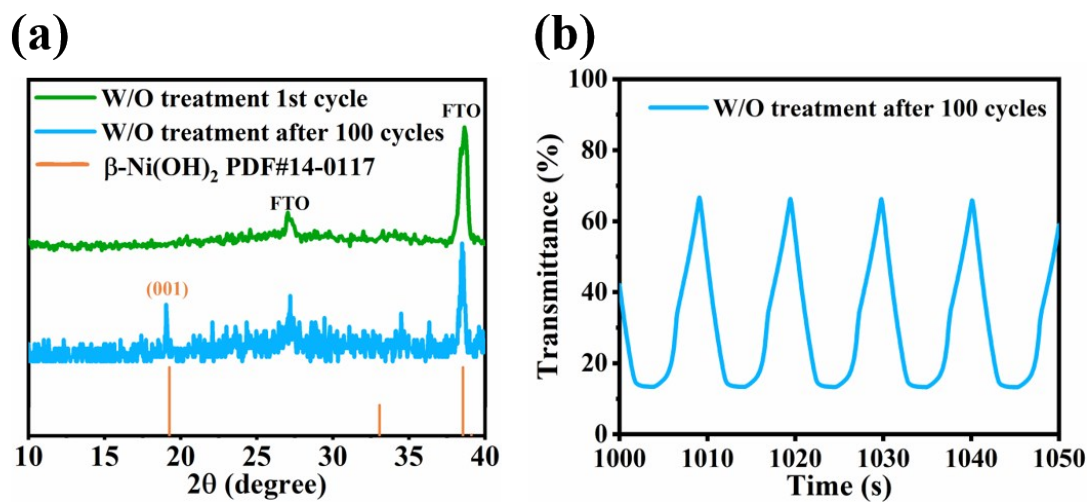

**Figure S2** (a) XRD patterns of  $\text{Ni(OH)}_2$  thin films which deposited at 40 °C after 100<sup>th</sup> cycling duration. (b) the corresponding transmittance spectrum.

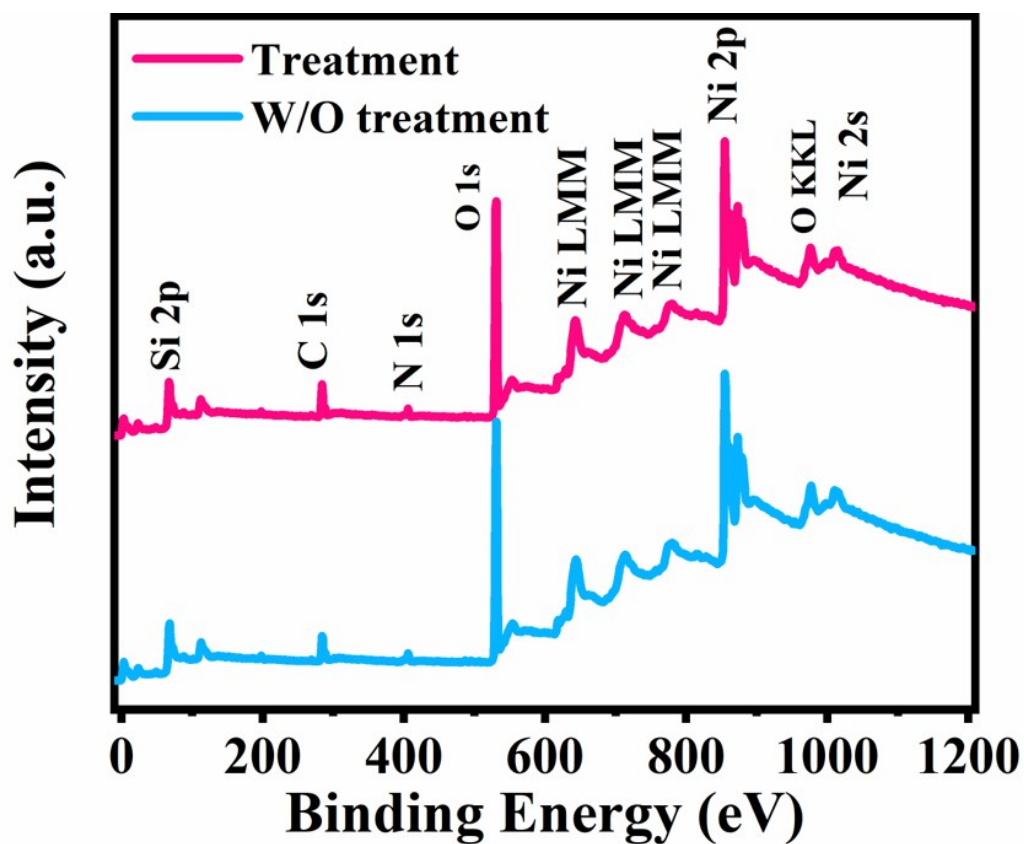

**Figure S3.** Survey scan XPS of the treated and untreated  $\text{Ni(OH)}_2$  EES electrodes.

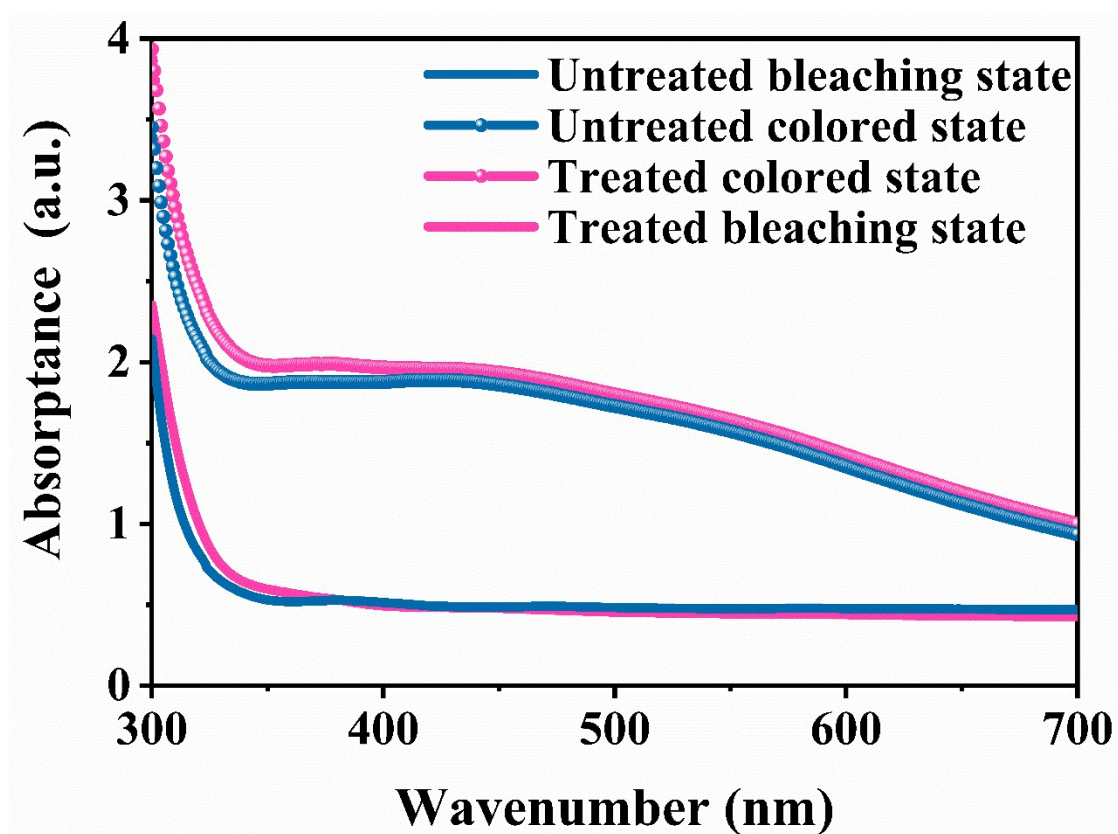

**Figure S4.** The corresponding absorption spectra of  $\text{Ni(OH)}_2$  electrodes.
